# Supplementary material for: Association between Time Restricted Feeding and Cognitive Status in Older Italian Adults
Source: PubMed Central journal article supplement (PMC7827225; doi:10.3390/nu13010191), 2021-01-09
Supplement: nutrients-13-00191-s001.pdf [file nutrients-13-00191-s001.pdf]

**Table S1.** Background characteristics by cognitive status.

|                                              | Cognitive status         |                           | <i>p</i> -value |
|----------------------------------------------|--------------------------|---------------------------|-----------------|
|                                              | Normal ( <i>n</i> = 801) | Impaired ( <i>n</i> = 82) |                 |
| <b>Sex, <i>n</i> (%)</b>                     |                          |                           | 0.200           |
| Men                                          | 352 (43.9)               | 30 (36.6)                 |                 |
| Women                                        | 449 (56.1)               | 52 (63.4)                 |                 |
| <b>Age, mean (SD)</b>                        | 60.3 (9.3)               | 70.3 (9.7)                | <0.001          |
| <b>Educational status, <i>n</i> (%)</b>      |                          |                           | 0.276           |
| Low                                          | 404 (50.4)               | 47 (57.3)                 |                 |
| Medium                                       | 265 (33.1)               | 20 (24.4)                 |                 |
| High                                         | 132 (16.5)               | 15 (18.3)                 |                 |
| <b>Occupational status (%)</b>               |                          |                           | 0.724           |
| Unemployed                                   | 183 (26)                 | 20 (28.6)                 |                 |
| Low                                          | 125 (17.8)               | 10 (14.3)                 |                 |
| Medium                                       | 215 (30.6)               | 19 (27.1)                 |                 |
| High                                         | 180 (25.6)               | 21 (30)                   |                 |
| <b>Smoking status, <i>n</i> (%)</b>          |                          |                           | 0.615           |
| Never smoker                                 | 449 (56.1)               | 48 (58.5)                 |                 |
| Former smoker                                | 168 (21)                 | 19 (23.2)                 |                 |
| Current smoker                               | 184 (23)                 | 15 (18.3)                 |                 |
| <b>Physical activity level, <i>n</i> (%)</b> |                          |                           | <0.001          |
| Low                                          | 163 (24.2)               | 33 (43.4)                 |                 |
| Moderate                                     | 336 (49.9)               | 34 (44.7)                 |                 |
| High                                         | 174 (25.9)               | 9 (11.8)                  |                 |
| <b>BMI categories, <i>n</i> (%)</b>          |                          |                           | 0.211           |
| Normal                                       | 268 (35.6)               | 32 (40.5)                 |                 |
| Overweight                                   | 314 (41.8)               | 25 (31.6)                 |                 |
| Obese                                        | 170 (22.6)               | 22 (27.8)                 |                 |
| <b>Health status, <i>n</i> (%)</b>           |                          |                           |                 |
| Type-2 diabetes                              | 136 (17)                 | 8 (9.8)                   | 0.092           |
| Hypertension                                 | 588 (73.4)               | 72 (87.8)                 | 0.004           |
| Dyslipidemias                                | 269 (33.6)               | 33 (40.2)                 | 0.226           |
| CVD                                          | 119 (15.4)               | 17 (21.5)                 | 0.155           |
| Cancer                                       | 66 (8.2)                 | 8 (9.8)                   | 0.637           |
